# Supplementary material
Source: PubMed Central journal article supplement (PMC3609884)
Supplement: NIHMS449128-supplement-01.pdf [file NIHMS449128-supplement-01.pdf]

**SUPPLEMENTAL MATERIALS****Stroke Impact Scale, Hand Domain**

Measures *difficulty* of hand motor usage

Instructions: The patient is asked, "For the hand most affected by your stroke, how difficult was it to use that hand to do each of the following" , then Q1-Q5 below are read aloud with the examiner recording responses.

- Q1. Carry heavy items
- Q2. Turn a doorknob
- Q3. Open a can or jar
- Q4. Tie a shoe lace
- Q5. Pick up a dime

Scoring: From 1-5 according to

- 1 = can not do at all
- 2 = very difficult
- 3 = somewhat difficult
- 4 = a little difficult
- 5 = not difficult at all

**Motor Activity Log, Amount of Use Domain**

Measures *amount* of arm usage

Instructions: The patient is asked, "Please rate your use of the stroke-affected arm, based on the amount of actual performance, for each of the following." The score sheet is then placed in front of patient, and Q1-Q10 below are read aloud with the examiner recording responses.

- Q1. Open a drawer
- Q2. Pick up a phone
- Q3. Wash your hands
- Q4. Put on your socks
- Q5. Pick up a glass
- Q6. Brush your teeth
- Q7. Put on makeup/shave
- Q8. Write on paper
- Q9. Use a fork or spoon for eating
- Q10. Comb your hair

Scoring: From 0-5 according to

- 0 = My weaker arm was not used during that activity (not used)
- 1 = My weaker arm was occasionally used during that activity (very rarely)
- 2 = My weaker arm was sometimes used during that activity, but my stronger arm did most of the work (rarely)
- 3 = My weaker arm was used about half as much as before the stroke during that activity (1/2 as much compared to pre-stroke)
- 4 = My weaker arm was used almost as much as before the stroke (3/4 as much compared to pre-stroke)
- 5 = My weaker arm was used as much as before the stroke (same as pre-stroke)
